# Supplementary material
Source: publisher site journal article supplement (https://www.dovepress.com/article/297062)
Supplement: Supplementary file 1 [file get_supplementary_file.php]

**Appendix 1: Studies Selected for Review**

| **Author** | **Treatment Category** | **Treatment Type** | **Methodology** |
| --- | --- | --- | --- |
| Abdollahi 2019147 | cam | vitamin D | rct |
| Abdollahifard 2014143 | cam | vitamin B1 | rct |
| Agha-Hosseini 2008135 | cam | saffron | rct |
| Alshammari 2021161 | cam | magnesium | review |
| Ambrosini 2013124 | cam | vitex agnus castus | open label, single treatment |
| Anwar 201575 | medication | danazol | open label, single treatment |
| Arab 2019146 | cam | vitamin D | meta-analysis |
| Armour 2018168 | cam | acupuncture | review |
| Askari 2018193 | psychotherapy | mindfulness | rct |
| Bäckström 202189 | medication | sepranolone | rct |
| Bahrami 2021103 | cam | curcumin | rct |
| Başoğul 2020194 | psychotherapy | psychoeducation | rct |
| Bharati 2016177 | cam | yoga/calcium | comparative effectiveness trial, with placebo |
| Bixo 201788 | medication | sepranolone | rct |
| Borji-Navan 2022197 | psychotherapy | cbt | rct |
| Bunevicius 200586 | medication | clonidine | rct |
| Busse 2009191 | psychotherapy | psychological interventions | meta-analysis |
| Canning 2010137 | cam | hypericum perforatum | rct |
| Çitil 2021181 | cam | pilates | quasi-experimental |
| Cohen 200244 | medication | fluoxetine | rct |
| Cohen 200438 | medication | paroxetine | rct |
| Cohen 200454 | medication | venlafaxine | open label, single treatment |
| Comasco 202169 | medication | ulipristal acetate | rct |
| Cronje 2004201 | surgery | hysterectomy/oophorectomy | open label, single treatment |
| Csupor 2019128 | cam | vitex agnus castus | meta-analysis |
| de Wit 202166 | medication | COCs | meta-analysis |
| Ebrahimi 2012158 | cam | magnesium/vitamin B6 | comparative effectiveness trial, with placebo |
| Eriksson 200835 | medication | escitalopram | rct |
| Fathizadeh 2010160 | cam | magnesium/vitamin B6 | comparative effectiveness trial, with placebo |
| Ford 201267 | medication | progesterone | review |
| Freeman 200158 | medication | EE/drosperinone | rct |
| Freeman 200434 | medication | sertraline | rct |
| Freeman 200536 | medication | escitalopram | comparative effectiveness trial, no placebo |
| Freeman 201265 | medication | EE/levo | review |
| Gerhardsen 2008164 | cam | Femal | rct |
| Ghaffarilaleh 2019174 | cam | yoga | rct |
| Ghaffarilaleh 2019175 | cam | yoga | rct |
| Ghanbari 2009150 | cam | calcium | rct |
| Halbreich 200233 | medication | sertraline | rct |
| Hasanpour 2019172 | cam | reflexology | rct |
| He 2009125 | cam | vitex agnus castus | rct |
| Horbatiuk 201768 | medication | progesterone | open label, single treatment |
| Hsiao 200353 | medication | venlafaxine | open label, single treatment |
| Hunter 2002199 | combination | cbt/fluoxetine | comparative effectiveness trial, no placebo |
| Jackson 201584 | medication | quetiapine | rct |
| Jafari 2020155 | cam | zinc | rct |
| Jafari 2020156 | cam | zinc | rct |
| Kamalifard 2017178 | cam | yoga | rct |
| Kancheva Landolt 2021190 | psychotherapy | cbt | review |
| Kashani 2010166 | cam | Femicomfort | rct |
| Khalesi 2019130 | cam | chamomile | review |
| Khayat 2015131 | cam | curcumin | rct |
| Kim 2011170 | cam | acupuncture | meta-analysis |
| Kleinstäuber 2012198 | combination | cbt/medications | meta-analysis |
| Kornstein 200647 | medication | sertraline | rct |
| Ladea 200837 | medication | escitalopram | open label, single treatment |
| Landén 200740 | medication | paroxetine | rct |
| Lukes 2011203 | surgery | endometrial ablation | open label, single treatment |
| Ma 2010126 | cam | vitex agnus castus | rct |
| Maged 2018179 | cam | swimming | rct |
| Marjoribanks 201350 | medication | ssri | review |
| Marr 201160 | medication | EE/drosperinone | rct |
| Marr 201161 | medication | EE/drosperinone | rct |
| Martinez 201671 | medication | 5-alpha reductase | rct |
| Mazza 200856 | medication | duloxetine | open label, single treatment |
| Miner 200245 | medication | fluoxetine | rct |
| Mitwally 200277 | medication | estrogen/progesterone addback | open label, single treatment |
| Mohammadi 2022161 | cam | omega-3 fatty acids | meta-analysis |
| Mohebbi Dehnavi 2018185 | cam | aerobic | rct |
| Momoeda 2014123 | cam | vitex agnus castus | open label, single treatment |
| Naheed 201770 | medication | estrogen | review |
| Nazari 201348 | medication | fluoxetine/buspirone | comparative effectiveness trial, no placebo |
| Panahi 2016191 | psychotherapy | mindfulness | rct |
| Pearce 2020178 | cam | aerobic | review |
| Pearlstein 200562 | medication | EE/drosperinone | rct |
| Pearlstein 200542 | medication | paroxetine | rct |
| Pirdadeh Beiranvand 2016136 | cam | saffron | rct |
| Quaranta 2007159 | cam | magnesium | open label, single treatment |
| Rajabi 2020134 | cam | saffron | rct |
| Ramos 200955 | medication | duloxetine | single blind, no placebo |
| Reid 2012202 | surgery | Hysterectomy/oophorectomy | review |
| Ryoo 2010138 | cam | hypericum perforatum | rct |
| Sadeghi 2022167 | cam | PMS50 | rct |
| Samadi 2013184 | cam | aerobic | quasi-experimental |
| Samieipour 2016144 | cam | calcium/B1 | comparative effectiveness trial, with placebo |
| Sampalis 2003109 | cam | omega-3 fatty acids | comparative effectiveness trial, no placebo |
| Sani 201485 | medication | acetazolamide | case series |
| Schellenberg 2012129 | cam | vitex agnus castus | rct |
| Segebladh 200978 | medication | estradiol/progesterone/addback | comparative effectiveness trial, no placebo |
| Shah 200851 | medication | ssris | meta-analysis |
| Sharma 2013176 | cam | yoga | comparative effectiveness trial, with placebo |
| Shobeiri 2017149 | cam | calcium | rct |
| Siahbazi 2017154 | cam | zinc | rct |
| Simsek Kücükkelepce 2021173 | cam | yoga/acupressure | comparative effectiveness trial, with placebo |
| Simsek Kücükkelepce 2021200 | combination | acupressure/psychoeducation | comparative effectiveness trial, with placebo |
| Samieipoor 2016142 | cam | vitamin B6 | meta-analysis |
| Steinberg 201230 | medication | fluoxetine | rct |
| Steiner 200543 | medication | paroxetine | rct |
| Steiner 200839 | medication | paroxetine | rct |
| Vaghela 2019183 | cam | aerobic/yoga | comparative effectiveness trial, no placebo |
| Verkaik 2017127 | cam | vitex agnus castus | meta-analysis |
| Weise 2019196 | psychotherapy | cbt | rct |
| Winther 2002165 | cam | Femal | rct |
| Wu 200841 | medication | paroxetine | comparative effectiveness trial, no placebo |
| Wyatt 200473 | medication | gnrh agonist/addback | meta-analysis |
| Yamada 2002132 | cam | kamishoyosan | open label, single treatment |
| Yamada 2007133 | cam | kamishoyosan | open label, single treatment |
| Yonkers 200549 | medication | drospirenone | rct |
| Yonkers 2013151 | cam | calcium | rct |
| Yonkers 201552 | medication | sertraline | rct |
| Zhang 2014182 | cam | baduanjin | open label, single treatment |
| Zhang 2019169 | cam | acupuncture | meta-analysis |

CAM = complementary and alternative medicine; RCT = randomized controlled trial; EE = ethinyl estradiol; COC = combined oral contraceptive; levo = levonorgestrel; cbt = cognitive behavioral therapy; ssris = selective serotonin reuptake inhibitors
